# Supplementary material for: Community Engagement and the Effectiveness of Free-Roaming Cat Control Techniques: A Systematic Review
Source: Animals (Basel). 2024 Feb 2;14(3):492. doi: 10.3390/ani14030492 (PMC10854515; doi:10.3390/ani14030492)
Supplement: Supplementary file 1 [file animals-14-00492-s001.zip › S2 Criteria 1,2 y 3 (44).xls]

## Sheet: Variables description
Variable	Description
ID	Article identification number (this does not correspond to the article of publication).
Year	Year of publication of the article.
Title	Article title.
Reference	Author(s) of the article.
Type of management	The cat population control techniques used (TNR and its variations, TR, TE).
Type of Cat	Type of cat involved (free roaming, stray cat, and feral cat).
Type of human grouping	Urban, rural or no human grouping.
Geographical area where the control was applied	Geographical area where the control was applied.
Country where the control was applied	Country where the control was applied.
Objetives	The objective of the article that is related to evaluate the effectiveness of a control technique.
Methodology	The methodology used to apply the control technique.
Results	Main observations and results of applying the control technique.
Conclusion	Conclusion of the author(s) on the application of the control technique.
Field case / Simulation	The article focuses on a simulation or field study.
Included/excluded for criterion 4 for

## Sheet: A2 Criterios 1,2 y 3 (44)
ID	Year	Title	Reference	Type of management	Type of Cat	Type of human grouping	Geographical area where the control was applied	Country where the control was applied	Objetives	Methodology	Results	Conclusion	Field case / Simulation	Included/excluded for criterion 4 because:
1	2009	Admissions of Cats to Animal Welfare Shelters in Melbourne, Australia	L. C. Marston and P. C. Bennett	Trap-euthanize (TE)	Stray cat and Feral Cat	Urban	Melbourne	Australia	To characterize cats admitted to a welfare shelter in metropolitan Melbourne, Australia and determine the contribution of the stray, feral, privately or communally owned cat populations to shelter admissions.	Tracked 15,206 cat admissions to 1 large Melbourne shelter over a 12-month period (June 1, 2005, to May 31, 2006). In addition, data relating to the physical condition of the cat upon admission were collected.	Although the participating shelters rehomed about one fifth (18.85%) of the cats admitted, the majority of the cats admitted (73.73%) were euthanized.	Almost three quarters of the cats admitted were euthanized, including many rehomeable kittens. This indicates an overpopulation of pet-quality cats in Victoria, Australia. Majority of cats admitted were strays.	Field case	Excluded, because the purpose of the article does not focus on applying a population control technique to control a specific cat population.
2	2005	Analysis of the impact of trap-neuter-return programs on populations of feral cats	P. Foley, J. E. Foley, J. K. Levy and T. Paik	Trap-Neuter-Return (TNR)	Feral cat	Urban	San Diego County, California and Alachua County, Florida	United States	To evaluate 2 county trap-neuter-return (TNR) programs for feral cat population management via mathematical modeling.	Data were analyzed with a mathematical Ricker model to describe population dynamics of the feral cats and modifications to the dynamics that occurred as a result of the TNR programs.	In both counties, results of analyses did not indicate a consistent reduction in per capita growth, the population multiplier, or the proportion of female cats that were pregnant.	Success of feral cat management programs that use TNR can be monitored by population modeling techniques and the results may be used to suggest possible future monitoring and modification of TNR programs.	Simulation	Excluded, because it focuses on the number of sterilized cats.
3	2020	Application of a high-quality, high-volume trap–neuter–return model of community cats in Seoul, Korea	Y. Cho, K. Kim, M. S. Kim and I. Lee	Trap–Neuter–Return (TNR)	Community cat, Free-roaming cat, Stray Cat, Feral Cat	Urban	Seoul	South Korea	To determine the characteristics of community cats that were admitted to trap–neuter–return (TNR) programs and the feasibility of the high-quality, high-volume spay/neuter (HQHVSN)	Cats were anesthetized, assessed for health status, sterilized, vaccinated and treated with insecticide. The TNR program at a local animal hospital and the program in this study were compared to assess the veterinary treatment administered and the cost for each cat.	A total of 375 cats were underwent TNR in this study, including 192 (51.2%) intact females, 180 (48%) intact males, and three (0.8%) sterilized cats. All cats presented to the TNR program were considered healthy enough to be part of the program after examination.	They were able to demonstrate that it is possible to effectively apply HQHVSN clinics in Korea. Future studies that perform intensive sterilization in targeted areas are necessary to confirm the efficacy of the TNR strategy.	Field case	Excluded, because it focuses on the number of sterilized cats.
4	2018	Application of a protocol based on trap-neuter-return (TNR) to manage unowned urban cats on an Australian university campus	H. Swarbrick and J. Rand	Trap–Neuter–Return (TNR)	Free-living cat (Free-roaming cat or free-ranging cat)	Urban	University of New South Wales (UNSW) in Sydney	Australia	To document a nine-year TNR program on an Australian university campus, supplemented by rehoming,	Ongoing audit of cats on campus, stabilization of cat numbers through TNR, and a subsequent reduction in cat numbers over time while maintaining the health of remaining campus cats by members of the CCC and other interested members of university staff and students.	At the beginning of the program, there were 69 resident cats. A further 34 immigrant cats (16 unsocialized and 18 socialized), and 19 kittens born on campus, were documented on the campus during the program. At the time of reporting (end of September 2017), the campus has a resident population of 15 cats.	The nine-year cat management program successfully reduced the campus cat population through a combination of TNR and rehoming.	Field case	Included, because it focuses on population control and population reduction.
5	2021	Applied sociology and animal advocacy: Creating a community cats coalition	I. Fiala	Trap-Neuter-Return (TNR)	Community cat, Feral cats and stray cats	Urban	Northeast Ohio	United States	To provide the history and evolution of a specific TNR program (i.e. the Community Cats Coalition of Ashtabula County) and the results of trapping and fixing community cats in the first year of running the program.	Take the strays cats to one of the neighboring counties that does have a TNR clinic. To assist in this need, a local non-profit has coordinated transportation for residents’ cats (and dogs) to a spay/neuter clinic in Cuyahoga County (two counties to the south of Ashtabula County).	In the first year of the CCCAC, a total of 510 cats were neutered, Because 57% of the cats that were neutered were female (289 female cats) and one female cat averages 12 kittens in one year, a minimum of 3468 kitten births were prevented.	Creating a Community Cats Coalition may be the first step to a formal, subsidized, county-wide TNR program. It is noted that the programs to address community cats are now almost always run by non-profit organizations.	Field case	Excluded, because it focuses on the number of sterilized cats.
6	2018	Assessment of a targeted trap-neuter-return pilot study in Auckland, New Zealand	S. Zito, G. Aguilar, S. Vigeant and A. Dale	Trap-Neuter-Return (TNR) (specifficly a targeted TNR (TTNR)	Stray cat	Urban	Auckland	New Zealand	To implemented a TTNR programme and assessed in one Auckland suburb from May 2015 to June 2016	TTNR programme was implemented and assessed in one Auckland suburb from May 2015 to June 2016. Assessment was based on the number of incoming felines; stray, unsocialised cats euthanased; unsocialised, unowned cats sterilised and returned (independently of the TTNR programme); and neonatal/underage euthanasias.	348 were sterilised and returned, 7 were euthanased, and one was trapped again to check a postoperative wound complication and was successfully treated and re-released	This pilot programme suggests that TTNR could be a valuable, humane cat management tool in urban New Zealand, and further assessment is warranted.	Field case	Excluded, because it focuses on the number of sterilized cats.
7	2019	Back to school: An updated evaluation of the effectiveness of a Long-Term Trap-Neuter-Return program on a university’s free-roaming cat population	D. D. Spehar and P. J. Wolf	Trap-neuter-return (TNR)	Community cat	Urban	University of Central Florida (UCF), Orlando, Florida	United States	Adds to this growing body of evidence by revealing the extent to which the results first reported by Levy et al.(2003) have been sustained over a subsequent 17-year period.	Cats were recorded and their presence tracked, end-point data were compared to results of the initial census and to published results from the conclusion of the initial observation period in 2002. End-point results were incorporated for the time period of January 1991 through March 2019 (“combined observation period”).	After a total of 28 years, 10 (5%) of 204 total cats enrolled in the UCF TNR program, remain on campus and the campus community cat population has declined by 85% from the completion of an initial census in 1996 to 2019. In addition, 11 of 16 total colonies were eliminated over a 28-year period.	These results occurred despite significant growth in enrollment at UCF over the same time frame, which suggests that with sufficient ongoing management of colony sites, declines in community cat populations associated with TNR are sustainable over long periods and under varying conditions.	Field case	Included, because it focuses on population control and population reduction.
8	2011	Behavioral differences between urban feeding groups of neutered and sexually intact free-roaming cats following a trap-neuter-return procedure	H. Finkler, I. Gunther and J. Terkel	Trap-neuter-return (TNR)	Free-roaming cats	Urban	In a typical feeding group site in the urban environment in Israel	Israel	To examine behavioral differences during a 1-year observational period between urban feeding groups of neutered and sexually intact free-roaming cats following a trap-neuterreturn procedure.	Trap-neuter-return procedures were applied to 2 cat feeding groups (A and B). Their social and feeding behaviors and frequency of appearance at feeding time were compared with those of 2 unneutered cat groups (C and D). Behavioral data were obtained from weekly observations before and during feeding over a 1-year period.	A lower rate of agonistic interactions was observed in the neutered groups than in the unneutered groups. Sexually intact male cats participated in more agonistic male-male encounters than did neutered male cats. Neutered cats in group A appeared earlier and had higher frequencies of feeding and appearance at the feeding site, compared with unneutered cats.	Less aggression was observed in the neutered groups, specifically, fewer agonistic neutered-neutered male encounters occurred.	Field case	Excluded, because it's focusing on population behavior of the cats to which the control technique was applied.
9	2022	Bioeconomic Modeling of Free-Roaming Cat Management (TESIS)	B. Thompson, C. Sims, T. Fisher, S. Brock, Y. Dai and S. Lenhart	Trap-neuter-return (TNR) and Trap-Euthanize (TE)	Free-roaming cats	Urban	Knox County, Tennessee	United States	To present a bioeconomic model using data from Knox County, TN that weighs benefits and costs of free-roaming cat control programs.	Highlight two key factors that determine which management strategy is most cost effective. The first is whether cat colony caretakers cooperate with management by decreasing food available for the cat colony. The second is the value attributed to saving the lives of wildlife and free-roaming cats	Based on plausible cat and wildlife values, TNR was the most cost effective when caretakers cooperated, but TE was the most cost-effective when caretakers did not cooperate.	Cooperation between agency officials and colony caretakers is an important consideration when weighing the relative merits of TE and TNR control programs.	Simulation	Excluded, because it's a simulation.
10	2018	A case study in citizen science: The effectiveness of a trap-neuter-return program in a Chicago neighborhood	D. D. Spehar and P. J. Wolf	Trap-neuter-return (TNR)	Free-roaming cat	Urban	Chicago, Illinois	United States	To examine the effectiveness of a TNR program conducted by a citizen scientist located in Chicago, Illinois, where a county law permitting TNR was enacted in 2007.	Management includes trapping, sterilizing and vaccinating cats (against rabies, at a minimum) and either returning them to the location of capture or arranging for adoption. Census information for each colony on an annual basis, at minimum, through a combination of visual observation (year-round) and informal interviews with colony caretakers (in December of each year).	Colony populations, when grouped by the number of years enrolled in the program, declined by a mean of 54% from entry and 82% from peak levels.	Much potential exists for citizen science to facilitate a better understanding of the impact of TNR on free-roaming cat populations. The CIMY case study outlined here fulfills this expectation.	Field case	Included, because it focuses on population control and population reduction.
11	2013	Costs and benefits of trap‐neuter‐release and euthanasia for removal of urban cats in Oahu, Hawaii	C. A. Lohr, L. J. Cox and C. A. Lepczyk	Trap-neuter-return (TNR) and Trap-Euthanize (TE)	Feral cat	Urban	Oahu, Hawaii	United States	To determine whether it is more cost-effective to control feral cat abundance with trap-neuter-release programs or trap and euthanize programs	Using STELLA 7, systems modeling software, they modeled changes over 30 years in abundance of cats in a feral colony in response to each management method and the costs and benefits associated with each method . They included costs associated with providing food, veterinary care, and microchips to the colony cats and the cost of euthanasia, wages, and trapping equipment in the model.	It took 30 years for trap-neuter-release to extirpate the colony. When the cat population was supplemented with 10% of the initial population size per year, the colony returned to carrying capacity within 6 years and the trap and euthanize program had to be repeated, whereas trap-neuter-release never reduced the number of cats to near zero within the 30-year time frame of the model.	Trap-neuter-release programs that employ volunteers are still less cost-effective than trap and euthanize programs that employ paid professionals and that trap-neuter-release was only effective when the total number of colony cats in an area was below 1000.	Simulation	Excluded, because it's a simulation.
12	2019	Decrease in population and increase in welfare of community cats in a twenty-three year trap-neuter-return program in Key Largo, FL: The ORCAT program	R. E. Kreisler, H. N. Cornell and J. K. Levy	Trap-neuter-return (TNR)	Free-roaming cat	Urban	Key Largo, Florida	United States	To evaluate the effect of a long-term (23-year) trap-neuter-return program on the population size of community cats in the Ocean Reef Community and to describe the demographic composition and outcome of enrolled cats.	A retrospective study was performed using both cat census data collected between 1999 and 2013 as well as individual medical records for cats whose first visit occurred between 3/31/1995 and 12/31/2017. Change over time was analyzed via linear regression.	Surveys of the cat population occurred in June 1999, January 2001, March 2003, November 2003, June 2004, June 2006, July 2007, January 2008, July 2009, and February 2013. Per the census records, the free-roaming cat population decreased over time from 455 cats recorded in 1999 to 206 recorded in 2013 (55% decrease).	A trap-neuter-return program operating for over two decades achieved a decrease in population and an increase in population welfare as measured by increased average age of population and decreased retrovirus prevalence.	Field case	Included, because it focuses on population control and population reduction.
13	2011	Demographic differences between urban feeding groups of neutered and sexually intact free-roaming cats following a trap-neuter-return procedure	I. Gunther, H. Finkler and J. Terkel	Trap-Neuter-Return (TNR)	Free-roaming cat	Urban	Gush Dan, Tel Aviv-Yafo.	Israel	To examine demographic differences during a 1-year observational period between urban feeding groups of neutered and unneutered free-roaming cats following a trap-neuter-return procedure.	Cats in 2 feeding groups were subjected to a trap-neuter-return (TNR) procedure. Cats in 2 other feeding groups were untreated. Data were collected on a weekly basis before and during feeding time over a 1-year period. Rates of immigration, emigration, and kitten survival were compared between neutered and unneutered groups.	The number of adult cats in the 2 neutered groups increased significantly during the study period because of higher immigration and lower emigration rates than in the unneutered groups, in which the number decreased.	Sexually intact cats immigrate into the neutered groups more readily and neutered cats reduce their emigration rates, possibly because of a reduction in reproductive and competitive pressures. To maintain a high proportion of neutered cats in such cat groups, persistent TNR campaigns are therefore necessary.	Field case	Excluded, because it's focusing on population behavior of the cats to which the control technique was applied.
14	2014	Effect of high-impact targeted trap-neuter-return and adoption of community cats on cat intake to a shelter	J. Levy, N. Isaza and K. Scott	Trap-neuter-return (TNR)	Feral cats and Stray cats	Urban	Alachua County, Florida	United States	To assess the effect of TNR concentrated in a region of historically high cat impoundments in a Florida community.	A 2-year program was implemented to capture and neuter at least 50% of the estimated community cats in a single 11.9 km2 zip code area, followed by return to the neighborhood or adoption. Trends in shelter cat intake from the target zip code were compared to the rest of the county.	After 2 years, per capita shelter intake was 3.5-fold higher and per capita shelter euthanasia was 17.5-fold higher in the non-target area than in the target area.	High-impact TNR combined with the adoption of socialized cats and nuisance resolution counseling for residents is an effective tool for reducing shelter cat intake.	Field case	Excluded, because the purpose of the article does not focus on applying a population control technique to control a specific cat population.
15	2015	Effectiveness of trap-spay/neuter-return programs on free-roaming cats as a form of rabies prevention	S. McGonagle	Trap-neuter-return (TNR)	Feral cats	Urban	Massachusetts counties	United States	To evaluate the effectiveness of trap-spay/neuter-return programs on the county level on free-roaming cats as a form of rabies prevention	Analysis of variance and analysis of covariance tests which compared the number of animals submitted for rabies testing per year by county.	There were statistically significant differences between the number of animals tested in each county, and the differences appeared to be associated with the presence of TNR programs or low cost spay/neuter programs, but only slightly	TNR programs are effective for reducing free-roaming cat populations, but the magnitude of the testing reduction, while statistically significant, is still small.	Field case	Excluded, because it is a thesis work of ID 41, and focuses on the number of sterilized cats.
16	2002	The effects of implementing a feral cat spay/neuter program in a Florida county animal control service	K. L. Hughes, M. R. Slater and L. Haller	Trap-neuter-return (TNR) and Trap-Euthanize (TE)	Feral cat	Urban	Orange County, Florida	United States	To determine whether implementation of a feral cat spay/neuter program resulted in the following: a decrease in total numbers of cats impounded, a decrease in total numbers of cats euthanized, a decrease in the total numbers of cat complaints received by the county, and a decease in costs to the county as compared to the estimated costs of impounding and euthanizing these animals.	The service collected data from a 6-year period both before and after the program's implementation. The service totaled the numbers of both cat and dog impoundments, surgeries, adoptions, euthanasias, and complaints for each year; standardized both sets of numbers on a per- 10,000-person basis to compare trends between dogs and cats; and calculated estimated costs for neutering versus impounding …	The percentage of impounded cats euthanized decreased between the periods before and after the program began, and the percentage adopted increased. The ratio of complaints to impounds decreased between the 2 periods, and the ratio of surgeries to impounds increased. Impoundments of cats were relatively steady in spite of the continually increasing human population	the Orange County program is a testament to the ability of communities to effectively approach their companion animal overpopulation problems through a collaborative effort among the citizens, government, and volunteer organizations to promote increased animal welfare.	Field case	Excluded, because the purpose of the article does not focus on applying a population control technique to control a specific cat population.
17	2020	Effects of the community cats program on population control, migration and welfare status of free-roaming cats in Tokyo, Japan	K. Mitsui, S. Sato and Y. Kakuma	Trap–neuter–return (TNR)	Free-roaming cats	Urban	Adachi City, Tokyo	Japan	To ascertain the effects of the CCP, a two-year survey of free-roaming cats was conducted in an area with CCP and another area without CCP in urban Tokyo, Japan.	A two-year route census of free-roaming cats was conducted in an area with CCP and the other area without CCP in urban Tokyo, Japan.	The estimated number of cats was lower in the CCP area than the non-CCP area, but there was no difference in the rate of decline in cat populations between areas. More cats disappeared (moved out, died, or entered homes) than appeared (moved in or born) in both areas in the second year and more males tended to move into the CCP area. The proportion of cats with poor health was lower in the CCP ar…	CCP may improve the welfare of free-roaming cats. As the effect of CCP was restrictive in reducing free-roaming cats, the further promotion of neutering of cats may be necessary.	Field case	Excluded, because there is no initial population determined because the control technique was applied before the study.
18	2017	Estimating free-roaming cat populations and the effects of one year Trap-Neuter-Return management effort in a highly urban area	R. Kilgour, S. Magle, M. Slater, A. Christian, E. Weiss and M. DiTullio	Trap-Neuter-Return (TNR)	Free-roaming cat	Urban	Harlem and Bedford-Stuyvesant), New York City	United States	To estimate free-roaming cat populations and also to measure the efficacy of a one-year TNR campaign in a highly urban area.	Using a sight/resight methodology, they examined free-roaming cat populations in four sites across two neighbourhoods (Harlem and Bedford-Stuyvesant) in New York City. Sampling was repeated after 1 year, during which an intensive TNR effort occurred in each of those areas. Free-roaming cats occur at high densities at all study sites, though populations varied, even within the same neighbourhood.	Results from this study found population estimates range from 2.6-4.1 cats/km. Additionally, they found between 78-98% turnover in each study area. After one year of TNR, the proportion of sterilised individuals in our treatment sites increased to 50%.	Management strategies directed toward free-roaming cats, such as TNR, may require a broad-scale approach, involving different facets of the community and should occur over multiple years.	Field case	Excluded, because it focuses on the number of sterilized cats and there is no initial population determined because the control technique was applied before the study.
19	2022	Ethical population management of feral cats on universities campuses based on Trap-Neuter-Return protocol	P. L. G. S. Vecchi, L. F. S. Grandi, F. Merida and V. L. F. Cisi	Trap-Neuter-Return (TNR)	Stray and feral cats	Urban	Two university's campuses, at Salto and Itu counties, São Paulo	Brazil	In the present study TNR program was established on two university's campuses, at Salto and Itu counties, where feral and stray cat population was uncontrolled.	From the beginning of the program in August 2020, an ongoing careful audit of campuses’ cats was conducted based on daily observations of cats seen at feeding sites and other campuses` locations, by the staff of the program.	In the present study 75% of the cats’ colony (7 males and 17 females) were sterilized at Salto´s campus. In the other hand, at Itu´s campus, 68% were sterilized (6 males and 11 females). Furthermore, a total of 14 kittens were placed for adoption (6 from Salto and 8 from Itu).	The provision of affordable services to neuter free-roaming cats raises awareness that cats require and deserve responsible care and enables people to behave ethically when cats take up residence on their property or in their neighborhood.	Field case	Excluded, because it focuses on the number of sterilized cats.
20	2009	Evaluation of euthanasia and trap–neuter–return (TNR) programs in managing free-roaming cat populations	P. M. Schmidt, T. M. Swannack, R. R. Lopez and M. R. Slater	Trap–neuter–return (TNR)	Free-roaming cats	Urban	Caldwell, Burleson County, Texas	United States	To evaluated control methods using a demographic population model for a 25-year period, with parameters estimated from an unmanaged, free-roaming cat population in Texas.	Modelled euthanasia and TNR at 25%, 50% and 75% implementation rates and a 50 : 50 combination of euthanasia and TNR at 25%, 50%, 75% and 100% implementation rates for 0%, 25% and 50% maximum immigration rates. We compared final population size, total number of cats treated and treatment effort relative to population reduction.	TNR and a 50 : 50 combination for all treatment rates when the immigration rate was 0%; however, they were higher for euthanasia at 25% and 50% maximum immigration rates. Euthanasia required higher treatment effort than TNR.	Euthanasia required higher treatment effort than TNR. Our results indicate that immigration must be prevented and high (>50%) treatment rates implemented to reduce free-roaming cat populations.	Simulation	Excluded, because it a simulation.
21	2003	Evaluation of the effect of a long-term trap-neuter-return and adoption program on a free-roaming cat population	J. K. Levy, D. W. Gale and L. A. Gale	Trap-neuter-return (TNR)	Free-roaming cat	Urban	The University of Central Florida, Orlando, Florida	United States	To evaluate the effect of a long-term trap-neuter-return program, with adoption whenever possible, on the dynamics of a free-roaming cat population.	Free-roaming cats residing on a university campus were trapped, neutered, and returned to the environment or adopted over an 11-year period.	During the observation period (January 1991 to April 2002), 75% of the cats were feral, and 25% were socialized. Kittens comprised 56% of the original population. At completion of the study in 2002, the population had decreased by 66%, from 68 to 23 cats (of which 22 were feral).	A comprehensive long-term program of neutering followed by adoption or return to the resident colony can result in reduction of free-roaming cat populations in urban areas.	Field case	Included, because it focuses on population control and population reduction.
22	2018	An Evaluation of Trap-Neuter-Release Practices for Free-Roaming Cat Populations	B. Gaston	Trap-neuter-release (TNR)	Free-roaming cat	Urban	Hays, Kansas	United States	To determine the population size and apparent survival of free-roaming cats in areas managed by a TNR program, determine population size and apparent survival of free-roaming cats in areas not managed by a TNR program, and compare the population sizes of TNR managed populations to those of unmanaged cat populations.	Between September 2011 and September 2012, free-roaming cats were trapped and marked at two sites managed by a TNR program, and at two unmanaged sites.	Population estimates indicated seasonal population changes in the unmanaged sites as well as TNR site 1, but not TNR site 2. TNR site 1 had a lower proportion of neuter cats (<50% neutered) while TNR site 2 had a much higher proportion of neutered individuals (~90% neutered). Population estimates of the unmanaged sites and TNR site 1 increased in the spring and decreased through the winter months.	This study showed TNR programs will need to maintain a high proportion of neutered individuals to prevent population increases and that a highly neutered colony is managed for a seasonally stable population of cats as opposed to a decreasing population.	Field case.	Excluded, because it focuses on the number of sterilized cats and focusing on population behavior of the cats to which the control technique was applied.
23	2019	Evaluation of unowned domestic cat management in the urban environment of Rome after 30 years of implementation of the no-kill policy (national and regional laws)	E. Natoli, L. Malandrucco, L. Minati, S. Verzichi, R. Perino, L. Longo, et al.	Trap-neuter-release (TNR)	Free-roaming cats	Urban	Rome	Italy	To evaluate the effects of the application of the Italian laws on management of urban free-roaming cats for the years 1988 to 2018.	Some indicators have been built and applied to the activity data: number of censused colonies and number of cats; number of stable colonies due to neutering; number of hygiene and sanitary notifications; number of notifications to check cat welfare; number of bites by unowned free-roaming cats; number of notifications of cat poisoning.	The total number of cats was 15,713, i.e., 8.37 cats per colony on average. Since the neutering campaign has begun, out of 1,878 cat colonies, 204 are stable thanks to the neutering.	The results of this survey suggest that an evolution in the relationship between humans and cats has taken place in Italy, prompting the shift from demographic control to the adoption of a more sensitive attitude toward cat welfare.	Field case	Included, because it focuses on population control and population reduction.
24	2017	An examination of an iconic trap-neuter-return program: The Newburyport, Massachusetts case study	D. D. Spehar and P. J. Wolf	Trap-neuter-return (TNR)	Free-roaming cats	Urban	Newburyport Waterfront, Massachusetts	United States	This paper retrospectively examines an iconic TNR program—began in 1992—that resulted in the elimination of hundreds of cats from the Newburyport, Massachusetts, waterfront.	Up to one-third of the cats trapped were sociable and adopted into homes; the remainder were sterilized and vaccinated before being returned to the waterfront, where they declined in number over time due to attrition.	A quick reduction of up to one-third of the cats on the waterfront was attributed to the adoption of sociable cats and kittens; the elimination of the remaining population; over a 17-year period; was ascribed to attrition. (in 2009 the last cat died at the age of 16)	These findings illuminate the potential effectiveness of TNR as a management practice; as well as call attention to the need for broad adoption of systematic data collection and assessment protocols.	Field case	Included, because it focuses on population control and population reduction.
25	2021	Free‐ranging domestic cat abundance and sterilization percentage following five years of a trap–neuter–return program	S. T. Coe, J. A. Elmore, E. C. Elizondo and S. R. Loss	Trap–neuter–return (TNR)	Free-ranging cats	Urban	Stillwater, Oklahoma	United States	To assess the effectiveness of a TNR program initiated in 2013 in Stillwater, Oklahoma, USA	Used trail cameras at 15 locations to estimate changes in cat abundance and the percentage of ear-tipped (i.e. sterilized) individuals between 2014 and 2018.	Estimated a non-significant decrease in abundance from 62 to 48 total cats across sampled locations. In 2018, approximately 27% of cats were ear-tipped compared to 0% in 2014, yet this percentage remains far below estimated sterilization levels needed for TNR to reduce unowned cat populations	Although additional long-term monitoring is needed, our results suggest that TNR conducted at its current intensity is unlikely to reduce Stillwater's cat population.	Field case	Included, because it focuses on population control and population reduction.
26	2018	Impact of a trap-neuter-return event on the size of free-roaming cat colonies around barns and stables in Quebec: A randomized controlled trial	V. Bissonnette, B. Lussier, B. Doizé and J. Arsenault	Trap-neuter-return (TNR)	Free-roaming cat	Rural	Quebec	Canada	The objective of this study was to evaluate the impact of a trap-neuter-return (TNR) event on the size of free-roaming rural cat colonies in Quebec.	The study took place from May 2014 to August 2015. The first 20 colonies that met all inclusion criteria were included. An intensive trapping effort took place for 48 h in each colony from the TNR group immediately after the size of each colony had been evaluated by camera. The comparability of the TNR and control group at randomization was evaluated by comparing the 2 groups at T0 using an exact…	A significant growth difference was observed in the number of cats between the TNR group and the control group at T7 (P = 0.03). When including kittens as well as adults, a trend towards a lower growth of the TNR group compared to the control group was noted at T7 (P = 0.06).	More field studies should be conducted in different settings in order to gain a better understanding of the main factors influencing the impact of TNR events. Given the scarce resources available for cat population control, it is essential that efforts are deployed the most efficient way possible and this can only be achieved if we have a good understanding of the problem.	Field Case	Included, because it focuses on population control and population reduction.
27	2018	The impact of an integrated program of return-to-field and targeted trap-neuter-return on feline intake and euthanasia at a municipal animal shelter	D. D. Spehar and P. J. Wolf	Trap-neuter-return (TNR)	Free-roaming cat and Feral cat	Urban	Albuquerque, New Mexico	United States	To examine changes in feline intake and euthanasia, as well as additional associated metrics, at a municipal animal shelter in Albuquerque, New Mexico, after institutionalized RTF and targeted TNR protocols, together referred to as a community cat program (CCP)	Were added to ongoing community-based TNR efforts and a pilot RTF initiative. As part of the three-year CCP cats were trapped, sterilized, vaccinated and returned or adopted.	Feline euthanasia at the Albuquerque Animal Welfare Department (AAWD) declined by 84.1% and feline intake dropped by 37.6% over three years; the live release rate (LRR) increased by 47.7% due primarily to these reductions in both intake and euthanasia.	The considerable decline in feline euthanasia at AAWD appears to be associated clearly with implementation of the RTF program. The concurrent reduction in feline intake, including kitten intake, is likely associated with the addition of targeted TNR, including utilization of the RFCM, upon initiation of the CCP.	Field case	Excluded, because the purpose of the article does not focus on applying a population control technique to control a specific cat population.
28	2020	The impact of targeted trap–neuter–return efforts in the San Francisco Bay area	D. D. Spehar and P. J. Wolf	Trap–neuter–return (TNR)	Community cats	Urban	San Francisco, California	United States	To examine the impact of a long-term TNR program on a population of community cats residing on a pedestrian trail adjacent to an oceanic bay located on the West Coast of the U.S.	A population of 175 community cats, as determined by an initial census, living on a 2-mile section of the San Francisco. Results from the initial census in 2004 were compared to results as of June 2020 for the entirety of the program area. Comparisons of results to similar TNR programs in other communities	A population of 175 community cats, as determined by an initial census, living on a 2-mile section of the San Francisco Bay Trail declined by 99.4% over a 16-year period. After the conclusion of the initial count, the presence of cats was monitored as part of the TNR program’s daily feeding regimen. Of the 258 total cats enrolled in the program between 2004 and 2020, only one remained at the end …	The results of the present study add to the mounting evidence indicating that TNR of sufficient duration and intensity is capable of greatly reducing a population of community cats and that, with adequate ongoing management, such results appear to be sustainable over long periods and in a variety of contexts.	Field Case	Included, because it focuses on population control and population reduction.
29	2002	Implementation of a feral cat management program on a university campus	K. L. Hughes and M. R. Slater	Trap-test-vaccinate-alter-return-monitor (TTVARM)	Feral cat	Urban	Texas A&M University, College Station, Texas	United States	To summarize results of the program for the period August 1998 to July 2000.	For the period August 1998 to July 2000, senior veterinary students examined cats that were humanely trapped once a month and tested them for feline leukemia and feline immunodeficiency virus infections, vaccinated, and surgically neutered them, he program placed kittens and tame cats for adoption.	Of the majority of 158 captured cats, there were less kittens caught in Year 2 than in Year 1. The proportion of tame cats trapped was significantly greater in Year 2 than in Year 1. Following surgery, 101 cats returned to campus. The project recaptured, retested, and revaccinated more than one-fourth of the cats due for their annual vaccinations. The program placed 32 kittens, juveniles, and tam…	Although the initial costs of starting up TTVARM programs can be substantial in terms of money and time, these tend to decrease with time as fewer new cats are caught. Often, people, providing free labor, are willing to donate their time to assist with feeding and trapping. In addition, some of the financial costs can be defrayed through donations	Field case	Excluded, because it focuses on the number of sterilized cats.
30	2000	Implementation of a feral cat management program on a university campus: population characteristics, outcomes, and educational impact.	K. L. Hughes	Trap-test-vaccinate-alter-return-monitor (TTVARM)	Feral cat	Urban	Texas A&M University, College Station, Texas	United States	To summarize results of the program for the period August 1998 to July 2000.	Cats were humanely trapped once a month. In surgery laboratories, senior veterinary students examined the cats, tested them for feline leukemia and feline immunodeficiency virus infections, vaccinated, and surgically neutered the cats. Cats testing positive for either disease were euthanized	The number of tame cats trapped was significantly greater in year 2 than in year 1. In the surgery laboratories, 112 cats were neutered. Ninety-nine cats were returned to campus following surgery. Approximately one-third of the cats due for their annual vaccinations were recaptured and revaccinated. Twenty-seven kittens and tame adults were placed for adoption.	An anonymous questionnaire was distributed to the TAMU veterinary class of 1999 to evaluate their attitudes regarding feral cat issues and their response to participation in the feral cat surgery laboratories, with regard to the best method for managing feral cats, 77% chose TTVAR.	Field Case	Excluded, because it is a thesis work of ID 41, and focuses on the number of sterilized cats.
31	2019	Integrated return-to-field and targeted trap-neuter-vaccinate-return programs result in reductions of feline intake and euthanasia at six municipal animal shelters	D. D. Spehar and P. J. Wolf	Trap-neuter-vaccinate-return (TNVR)	stray and feral cats	Urban	Albuquerque, New Mexico.San Antonio, Texas. Baltimore, Maryland, Philadelphia, Pennsylvania. Tucsin, Arizona. Columbus, Georgia.	United States	The present study examines changes in feline intake and euthanasia, as well as impacts on associated metrics, at municipal shelters located in six diverse U.S. communities after integrated programs of RTF and targeted TNVR (collectively termed “community cat programs,” CCPs) were implemented.	Results from only the originally scheduled 3-year program period for each CCP was examined at municipal shelters located in six diverse U.S. communities after integrated programs of RTF and targeted TNVR (collectively termed “community cat programs,” CCPs) were implemented.	A total of 72,970 cats were enrolled in six 3-year CCPs, 71,311 of whom (98%) were sterilized, vaccinated, and returned to their location of capture or adopted. A median reduction of 32% in feline intake, as well as a median decline of 83% in feline euthanasia occurred across the six CCPs; median feline live-release rate increased by 53% as a result of these simultaneous declines in cat admission…	The integration of RTF and targeted TNVR protocols appears to result in greater feline intake and euthanasia reductions than programs lacking such an integrated approach.	Field Case	Excluded, because the purpose of the article does not focus on applying a population control technique to control a specific cat population.
32	2006	Management of feral domestic cats in the urban environment of Rome (Italy)	E. Natoli, L. Maragliano, G. Cariola, A. Faini, R. Bonanni, S. Cafazzo, Fantini, C.	Trap-neuter-release (TNR)	Feral cat	Urban	Rome	Italy	To present data on registered colonies and censused cats in Rome from 1991 to 2000; the results of the neutering campaign from 1991 to 2000 in a TNR program.	Colonies were censused and registered by the VPS (Veterinary Public Services) after an evaluation on the site and on the state of the cats. A survey to describe the effects of the neutering campaign was started in November of 2000 and was completed in June 2001.	Number of cats per colony ranged from 3 to more than 80. In 10 years, almost 8000 (out of 13,273 cats declared and 5792 colonies registered) were captured by cat care-takers, neutered by the VPS and reintroduced in their original colony by cat care-takers. The survey carried out in 2000 on 103 cat colonies showed that the neutering campaigns brought about a general decrease in cat number (from 16…	All these efforts without an effective education of people to control the reproduction of house cats (as a prevention for abandonment) are a waste of money, time and energy. The main evidence is that TNR programs produce a conspicuous (16–32%) decrease on total cat number, but not as great as hoped and not before at least 3 years from neutering.	Field Case	Included, because it focuses on population control and population reduction.
33	2011	Managing feral cats on a university's campuses: how many are there and is sterilization having an effect?	A. L. Jones and C. T. Downs	Trap-neuter-return (TNR)	Feral cat	Urban	5 campuses of the University of KwaZulu-Natal	South Africa	To estimate the size of the feral cat population on 5 campuses of the University of KwaZulu-Natal, South Africa, to determine whether sterilization has an effect and to make management recommendations.	The study used both the total count and mark-recapture methods to estimate the feral cat population on each campus. The study chose a noninvasive method of taking photographs to “mark” individuals and record those who were sterilized.	There was a negative relationship between sterilization and numbers. Sites with higher sterilization showed a lower proportion of younger cats. At the average sterilization of 55%, the population, according to predictions, would remain stable at fecundity, survival, and immigration rates reported by cat caretakers.	An annual census is recommended to monitor the level of sterilization and numbers over the long term. Caretakers' feral cat sterilization and feeding programs appear to provide a service to the university community.	Field case	Excluded, because it focuses on the number of sterilized cats and population behavior of the cats to which the control technique was applied.
34	2014	Modeling Feral Cat Population Dynamics in Knox County, TN	L. E. Lee, N. Robl, A. M. Bugman, A. T. Nguyen, B. Lammers, T. L. Fisher, et al.	Trap-neuter-return (TNR)	Feral cat	Urban	Knox County, Tennessee	United States	The objective of this model is to predict the impact of selected strategies on the population of feral cats.	The model with three age classes predicts the population over a period of 5 years in one month time steps.	At the initial time, all of the below scenarios depict colonies of 25 intact female cats, If they assume the population has a high level of immigration and low level of abandonment, a 74% spay rate is required to stabilize the population	Targeting TNR intervention at adult females during the time prior to mating season in highly populated feral colonies may further decrease the population. These results suggest a more efficacious strategy than non-targeted TNR programs.	Simulation	Excluded, because it is a simulation.
35	2019	Neutering effects on social behaviour of urban unowned free-roaming domestic cats	S. Cafazzo, R. Bonanni and E. Natoli	Trap-neuter-return (TNR)	Free-roaming cat	Urban	Rome	Italy	The aim of this study is to investigate such effects. Before neutering, the group consisted of 17 free-roaming domestic cats, who were totally unrestrained.	After neutering it consisted of 16 individuals. The social behaviour of cats, living in the group, was registered, using classic ethological methods (735 h of observation before and 537 h after neutering).	The results of this study suggest that, after neutering: (i) The group of free-ranging cats was stable over time; (ii) the hierarchical structure of the cat social group did not change; (iii) the general level of activity, decreased; (iv) urine spraying marking behaviour almost disappeared; (v) the level of proximity decreased although it tended to increase in a few male–male dyads.	The most obvious effect of neutering, detected on individual behaviour, was that cats were less active.	Field case	Excluded, becuse it's focusing on population behavior of the cats to which the control technique was applied.
36	2021	Population dynamics of community cats living in a tourist area of Onomichi City, Japan, before and after the trap-test-vaccinate-alter-return-monitor event	A. Seo, Y. Ueda and H. Tanida	Trap-Test-Vaccinate-Alter-Return-Monitor (TTVARM)	Free-roaming cats, community cats.	Urban	Onomichi City	Japan	To examined the population dynamics of cats before and after a TTVARM event using route censuses (107 days), fixed-point observations, and GPS-tracking in a tourist area in Onomichi.	Using route censuses (107 days), fixed-point observations, and GPS-tracking in a tourist area in Onomichi.	11 out of the 30 cats remained in the CCP areas, whereas 13 nonneutered cats immigrated into the CCP areas, within a year, suggesting the CCP program has limited efficacy. Besides, the program cannot support the lifetime management of the cats due rapid turnover of cats.	The results reject the CCP hypothesis, so that the program neither restricts cat breeding nor enhances cat welfare.	Field case	Excluded ,becuse it's focusing on population behavior of the cats to which the control technique was applied.
37	2018	Population Genetics of Feral Cats in Harvey County, Kansas	B. Wiens and T. Shima	Trap-Neuter-Release (TNR)	Feral cats	Urban	Newton, Harvey County, Kansas	United States	The effects of control strategies and a basic understanding of invasive species populations can be gathered through genetic analyses	Genotypes from each individual cat were used to obtain estimates of population structure, relatedness, gene flow, heterozygosity, genetic diversity, and allelic richness of the feral cat population in Harvey County.	Very little structure was found in the overall population, as indicated by the F statistics (Fst=0.011, p=0.050, Fis=0.243, p=0.001, Fit=0.251, p=0.001), relatedness (0.033), and the correlation coefficient of the Mantel test (Rxy=0.048, p=0.173). These findings also point to little relatedness among individuals within the population and long range dispersal ability of the cats.	Estimates of heterozygosity, genetic diversity, and allelic richness, in addition to the other measures, help to establish a baseline understanding of the population genetics of feral cats in Newton, which future studies can use to monitor the effectiveness of population control strategies over time.	Field case	Excluded, because It does not focus on population reduction or the application of the technique.
38	2020	Predicting feral cat-reduction targets and costs on large islands using stochastic population models 2	K. R. Venning, F. Saltré and C. J. Bradshaw	Trap-neuter-return (TNR) compared with Culling	Feral cat	Wild	Kangaroo Island	Australia	To constructed a stochastic population model with cost estimates to test the relative effectiveness and cost-efficiency of two main culling scenarios for Kangaroo Island to 2030 and also examined the effectiveness of a trap-neuter-return scenario to compare with the culling outcomes.	They constructed Leslie matrices to represent age-specific fertility and survival for the cat population and obtained cat fertility and survival estimates from six studies of domestic, stray and feral cat population across the USA and Australia. and summarised the population dynamics from a study in Western Australia done in the preliminary stages of cat eradication.	Their model outputs show that a realised annual fertility equivalent to ≤ 25% of expected values (i.e., pre-fertility treatment) would reduce the population to ≤ 10%. In other words, managers would have to maintain at least 75% of the female cat population sterilised each year from 2019-2030 for the program to reduce the population to ≤ 10% of its original size. Fertility-reduction is a much less…	Their model results provided direction for the efficient eradication of feral cats on Kangaroo Island and can be transferred to feral-cat management elsewhere.	Simulation	Excluded, because it ia a simulation.
39	2017	Prospects for domestic and feral cat management on an inhabited tropical island	R. A. Dias, C. R. Abrahão, T. Micheletti, P. R. Mangini, V. P. de Oliveira Gasparotto, H. F. de Jesus Pena, et al.	Trap-Remove (TR)	Free-roaming cats	No human grouping (Wild)	Fernando de Noronha	Brazil	The aims of this study were to determine the cat population structure and simulate the impact of different intervention strategies	The model was deterministic, and the simulations were applied in the midpoint of a 1-year period. Using population dynamic simulations, the long-term effects of reproduction control and removal of cats from the archipelago.	Removal of cats was also suggested as a necessary management strategy to achieve negative population growth. In addition, it was more cost-effective than reproduction control. However, applying both removal and sterilization strategies to this population resulted in a higher population decrease than removal alone	For these reasons, a combination of reproductive control and cat eradication should be implemented in Fernando de Noronha.	Simulation	Excluded, because it a simulation.
40	2017	Rates of death and euthanasia for cats in no-kill shelters in the Czech Republic	V. Večerek, K. Kubesová, E. Voslářová and I. Bedáňová	Trap-euthanize (TE)	Stray cat	Urban	Three cat shelters situated in different regions of the Czech Republic	Czech Republic	The aim of the study was to analyze the records of the death and euthanasia rates of cats in Czech cat shelters in the period from 2011 to 2015.	The subjects of this retrospective study were cats impounded in three cat shelters situated in different regions of the Czech Republic. Out of a total of 2,170 cats, further analysis was performed on cats that died or had to be euthanized due to health reasons in the period from January 1, 2011, to December 31, 2015.	In the period from 2011 to 2015, 474 cats died and 240 had to be euthanized for health reasons in the three cat shelters monitored in their study. Death was the ultimate outcome for 33% of the cats admitted in the shelters. The number of cats that died was almost double the number of cats that were euthanized; this suggests that attempts to cure cats were favoured over euthanasia, even in cases o…	A limitation of this study as well as other shelter studies is the lack of medical records but most shelters do not have the resources for diagnostic testing nor post mortem examination. However, since the majority of mortalities occurred shortly after admission, it is more likely that they resulted from the poor condition of the cats at the time of admission than from the shelter’s environment	Field case	Excluded because its objective is not to control a specific population or to apply a control technique.
41	2011	Social Organization and Behavioural Patterns of a Neutered Feral Cat Colony in an Urban Environment (Felis catus)	전진경	Trap-Neuter-Return (TNR)	Feral Cat	Urban	Seoul	South Korea	Examining the dynamics of a cat colony formed by the neutered cats through the cat inflow into the food station and the change in colony members. Suggesting the information for cat’s enhanced welfare based on the study findings on the neutered cats in relation to TNR.	Set up two food stations in the study area, Three months later, the cats that came to eat the food were captured (February, 2007), neutered, marked with ear tipping for identification and returned to the original place where they were captured	Analyses based on video recording and direct observation revealed that the affiliative interactions such as cross proximity and allorubbing, mostly noted in female cats, were consistently observed in the TNR male cats. Markov-chain analyses also suggested that the core group seemed to regard the food station as their territory, but the regular visitors tended to use the food station for foraging …	The coalition behavior exhibited by the members of the core group, which never been reported before among adult male cats, has a similarity with that of male cheetahs to secure territory.	Field case	Excluded, because it's focusing on population behavior of the cats to which the control technique was applied.
42	2014	Study of the effect on shelter cat intakes and euthanasia from a shelter neuter return project of 10,080 cats from March 2010 to June 2014	K. L. Johnson and J. Cicirelli	Trap, neuter and return (TNR)	Feral cat and community cats	Urban	City of San Jose, Santa Clara County, California	United States	The goal of this report is to show the changes in cat intakes and euthanasia at the San Jose shelter from fiscal years 2010 to 2014 during the TNR program, and how the impounds differed among the five county shelters reporting data overall.	The program requires incoming feral/free roaming cats be held 72 h, and these cats are included in shelter intake numbers. Within 24 h of entering the shelter system the cats are evaluated for inclusion in the SNR program	Four years into the program, researchers observed cat and kitten impounds decreased 29.1%; euthanasia decreased from over 70% of intakes in 2009, to 23% in 2014. Euthanasia in the shelter for Upper Respiratory Disease decreased 99%; dead cat pick up off the streets declined 20%.	The establishment of this program involved a partnership between the shelter and non-profit volunteers. The collaboration has resulted in reduced cat euthanasia and impounds, with increased satisfaction of volunteer organizations advocating for more humane methods to handle the intact free roaming cat population.	Field Case	Excluded, because the purpose of the article does not focus on applying a population control technique to control a specific cat population.
43	2002	A trap, neuter, and release program for feral cats on Prince Edward Island	K. L. Gibson, K. Keizer and C. Golding	Trap - neuter and release (TNR)	Feral cat	Urban	Prince Edward Island	Canada	To describes a trap, test, vaccinate, neuter, and release program, designed to decrease the birth rate within the feral cat population and decrease the stressors in their lives	Feral cats from specific geographic areas were trapped, sedated, and tested for feline leukemia virus and feline immunodeficiency virus. Healthy cats were neutered, dewormed, vaccinated, tattooed, and released to their area of origin. Community residents were notified through flyers placed in public places (shopping malls, mail boxes) and newspaper announcements.	A total of 185 cats and kittens were trapped and tested during a 14-week period; 158 cats and kittens as young as 6 weeks of age were neutered and released. 23 adult cats were positive for feline leukemia virus, feline immunodeficiency virus, or both, and were euthanized.	With a lowered birth rate and vaccination against the agents of common infectious feline diseases, there will be reduced competition and improvements in the health and population dynamics of the feral cats. If this program can be continued, it may ultimately lead to a decrease in overpopulation, disease, and death among cats on PEI. CVJ	Field case	Excluded, because it focuses on the number of sterilized cats.
44	2017	Trap-Neuter-Return Activities in Urban Stray Cat Colonies in Australia	Kuan Tan, Jacquie Rand and John Morton	Trap-Neuter-Return (TNR)	Stray cat	Urban	X	Australia	The aims of this study were to describe TNR activities in Australia, and to estimate their effect on colony size.	Adults involved with TNR in Australia were invited to participate. Data from 53 respondents were collected via an anonymous online questionnaire.	Respondents were mostly middle-aged women, and more participated as individuals than with organizations. Colony size decreased from a median of 11.5 cats to 6.5 cats over 2.2 years, through adoptions and desexing a median of 69% of the colony.	These findings indicate that TNR, when involving high desexing rates within colonies, adoption of kittens and friendly adults, and ongoing oversight by volunteer caretakers, can reduce cat numbers over time, improve health and welfare of cats and kittens, and is largely funded by private individuals and organizations.	Field case	Excluded, because it does not focus on a specific geographic area, and it does not explain how the control technique is applied.
