# Supplementary material for: Community Engagement and the Effectiveness of Free-Roaming Cat Control Techniques: A Systematic Review
Source: Animals (Basel). 2024 Feb 2;14(3):492. doi: 10.3390/ani14030492 (PMC10854515; doi:10.3390/ani14030492)
Supplement: Supplementary file 1 [file animals-14-00492-s001.zip › S3 Criteria 1,2, 3 y 4 (11).xls]

## Sheet: Variables description
Variable	Description
ID	Article identification number (this does not correspond to the article of publication).
Year	Year of publication of the article.
Title	Article title.
Reference	Author(s) of the article.
Type of management	The cat population control techniques used (TNR and its variations, TR, TE).
Type of Cat	Type of cat involved (free roaming, stray cat, and feral cat).
Type of human grouping	Urban, rural or no human grouping.
Geographical area where the control was applied	Geographical area where the control was applied.
Country where the control was applied	Country where the control was applied.
Objetives	The objective of the article that is related to evaluate the effectiveness of a control technique.
Methodology	The methodology used to apply the control technique.
Results	Main observations and results of applying the control technique.
Conclusion	Conclusion of the author(s) on the application of the control technique.
Years of aplication	The length of time (years) that the effectiveness of the control technique was evaluated.
Initial population	Initial feline population to which the control technique was applied.
Final population	Resulting population at the end of the evaluation period of its effectiveness.
Participation of the human groupings	It considered whether there was participation of the communities where the control method was applied.
Type of participation of human groupings	Those studies in which there was participation of human groups were classified as adoption, trappers, caretakers and education.

## Sheet: A3 Criterios 1,2,3 y 4 (11)
ID	Year	Title	Reference	Type of management	Type of Cat	Type of human grouping	Geographical area where the control was applied	Country where the control was applied	Objetives	Methodology	Results	Conclusion	Years of aplication	Initial population	Final population	Participation of the human groupings	Type of participation of human groupings
4	2018	Application of a protocol based on trap-neuter-return (TNR) to manage unowned urban cats on an Australian university campus	H. Swarbrick and J. Rand	Trap–neuter–return (TNR)	Free-roaming cat	Urban	University of New South Wales (UNSW) in Sydney	Australia	To document a nine-year TNR program on an Australian university campus, supplemented by rehoming.	Ongoing audit of cats on campus, stabilization of cat numbers through TNR, and a subsequent reduction in cat numbers over time while maintaining the health of remaining campus cats.	At the beginning of the program, there were 69 resident cats. A further 34 immigrant cats and 19 kittens born on campus, were documented on the campus during the program. At the time of reporting (end of September 2017), the campus has a resident population of 15 cats.	The nine-year cat management program successfully reduced the campus cat population through a combination of TNR and rehoming.	9 years	69	15	Yes	Adoption, Caretaker, Trappers, Education
7	2019	Back to school: An updated evaluation of the effectiveness of a Long-Term Trap-Neuter-Return program on a university’s free-roaming cat population	D. D. Spehar and P. J. Wolf	Trap-neuter-return (TNR)	Free-roaming cat	Urban	University of Central Florida (UCF), Orlando, Florida	United States	Adds to this growing body of evidence by revealing the extent to which the results first reported by Levy et al.(2003) have been sustained over a subsequent 17-year period.	Cats were recorded and their presence tracked, end-point data were compared to results of the initial census and to published results from the conclusion of the initial observation period in 2002. End-point results were incorporated for the time period of January 1991 through March 2019 (“combined observation period”).	After a total of 28 years, 10 (5%) of 204 total cats enrolled in the UCF TNR program, remain on campus and the campus community cat population has declined by 85% from the completion of an initial census in 1996 to 2019. In addition, 11 of 16 total colonies were eliminated over a 28-year period.	These results occurred despite significant growth in enrollment at UCF over the same time frame, which suggests that with sufficient ongoing management of colony sites, declines in community cat populations associated with TNR are sustainable over long periods and under varying conditions.	28 years	204	10	Yes	Adoption, Caretakers, Trappers
10	2018	A case study in citizen science: The effectiveness of a trap-neuter-return program in a Chicago neighborhood	D. D. Spehar and P. J. Wolf	Trap-neuter-return (TNR)	Free-roaming cat	Urban	Chicago, Illinois	United States	To examine the effectiveness of a TNR program conducted by a citizen scientist located in Chicago, Illinois, where a county law permitting TNR was enacted in 2007.	Management includes trapping, sterilizing and vaccinating cats (against rabies, at a minimum) and either returning them to the location of capture or arranging for adoption. Census information for each colony on an annual basis, at minimum, through a combination of visual observation (year-round) and informal interviews with colony caretakers (in December of each year).	Colony populations, when grouped by the number of years enrolled in the program, declined by a mean of 54% from entry and 82% from peak levels.	Much potential exists for citizen science to facilitate a better understanding of the impact of TNR on free-roaming cat populations. The CIMY case study outlined here fulfills this expectation.	9 years	195	44	Yes	Adoption, Trappers ,Caretakers, Education
12	2019	Decrease in population and increase in welfare of community cats in a twenty-three year trap-neuter-return program in Key Largo, FL: The ORCAT program	R. E. Kreisler, H. N. Cornell and J. K. Levy	Trap-neuter-return (TNR)	Free-roaming cat	Urban	Key Largo, Florida	United States	To evaluate the effect of a long-term (23-year) trap-neuter-return program on the population size of community cats in the Ocean Reef Community and to describe the demographic composition and outcome of enrolled cats.	A retrospective study was performed using both cat census data collected between 1999 and 2013 as well as individual medical records for cats whose first visit occurred between 3/31/1995 and 12/31/2017. Change over time was analyzed via linear regression.	Surveys of the cat population occurred in June 1999, January 2001, March 2003, November 2003, June 2004, June 2006, July 2007, January 2008, July 2009, and February 2013. Per the census records, the free-roaming cat population decreased over time from 455 cats recorded in 1999 to 206 recorded in 2013 (55% decrease).	A trap-neuter-return program operating for over two decades achieved a decrease in population and an increase in population welfare as measured by increased average age of population and decreased retrovirus prevalence.	23 years	455	206	Yes	Adoption,Trappers, Caretakers
21	2003	Evaluation of the effect of a long-term trap-neuter-return and adoption program on a free-roaming cat population	J. K. Levy, D. W. Gale and L. A. Gale	Trap-neuter-return (TNR)	Free-roaming cat	Urban	The University of Central Florida, Orlando, Florida	United States	To evaluate the effect of a long-term trap-neuter-return program, with adoption whenever possible, on the dynamics of a free-roaming cat population.	Free-roaming cats residing on a university campus were trapped, neutered, and returned to the environment or adopted over an 11-year period.	During the observation period (January 1991 to April 2002), 75% of the cats were feral, and 25% were socialized. Kittens comprised 56% of the original population. At completion of the study in 2002, the population had decreased by 66%, from 68 to 23 cats (of which 22 were feral).	A comprehensive long-term program of neutering followed by adoption or return to the resident colony can result in reduction of free-roaming cat populations in urban areas.	11 years	68	23	Yes	Adoption, Trappers,Caretakers
23	2019	Evaluation of unowned domestic cat management in the urban environment of Rome after 30 years of implementation of the no-kill policy (national and regional laws)	E. Natoli, L. Malandrucco, L. Minati, S. Verzichi, R. Perino, L. Longo, et al.	Trap-neuter-return(TNR)	Free-roaming cats	Urban	Rome	Italy	To evaluate the effects of the application of the Italian laws on management of urban free-roaming cats for the years 1988 to 2018.	Some indicators have been built and applied to the activity data: number of censused colonies and number of cats; number of stable colonies due to neutering; number of hygiene and sanitary notifications; number of notifications to check cat welfare; number of bites by unowned free-roaming cats; number of notifications of cat poisoning.	The total number of cats was 15,713, i.e., 8.37 cats per colony on average. Since the neutering campaign has begun, out of 1,878 cat colonies, 204 are stable thanks to the neutering.	The results of this survey suggest that an evolution in the relationship between humans and cats has taken place in Italy, prompting the shift from demographic control to the adoption of a more sensitive attitude toward cat welfare.	30 years	1878 colonies (8.37 cats per colony approx.) 15.718,86	1789 colonies (8.37 cats per colony approx.) 14.973,93	Yes	Caretakers
24	2017	An examination of an iconic trap-neuter-return program: The Newburyport, Massachusetts case study	D. D. Spehar and P. J. Wolf	Trap-neuter-return (TNR)	Free-roaming cats	Urban	Newburyport Waterfront, Massachusetts	United States	This paper retrospectively examines an iconic TNR program—began in 1992—that resulted in the elimination of hundreds of cats from the Newburyport, Massachusetts, waterfront.	Up to one-third of the cats trapped were sociable and adopted into homes; the remainder were sterilized and vaccinated before being returned to the waterfront, where they declined in number over time due to attrition.	A quick reduction of up to one-third of the cats on the waterfront was attributed to the adoption of sociable cats and kittens; the elimination of the remaining population; over a 17-year period; was ascribed to attrition. (in 2009 the last cat died at the age of 16)	These findings illuminate the potential effectiveness of TNR as a management practice; as well as call attention to the need for broad adoption of systematic data collection and assessment protocols.	17 years	300	0	Yes	Adoption, Trappers, Caretakers, Education
25	2021	Free‐ranging domestic cat abundance and sterilization percentage following five years of a trap–neuter–return program	S. T. Coe, J. A. Elmore, E. C. Elizondo and S. R. Loss	Trap–neuter–return (TNR)	Free-roaming cats	Urban	Stillwater, Oklahoma	United States	To assess the effectiveness of a TNR program initiated in 2013 in Stillwater, Oklahoma, USA	Used trail cameras at 15 locations to estimate changes in cat abundance and the percentage of ear-tipped (i.e. sterilized) individuals between 2014 and 2018.	Estimated a non-significant decrease in abundance from 62 to 48 total cats across sampled locations. In 2018, approximately 27% of cats were ear-tipped compared to 0% in 2014, yet this percentage remains far below estimated sterilization levels needed for TNR to reduce unowned cat populations	Although additional long-term monitoring is needed, our results suggest that TNR conducted at its current intensity is unlikely to reduce Stillwater's cat population.	5 years	62	48	Yes	Trappers
26	2018	Impact of a trap-neuter-return event on the size of free-roaming cat colonies around barns and stables in Quebec: A randomized controlled trial	V. Bissonnette, B. Lussier, B. Doizé and J. Arsenault	Trap-neuter-return (TNR)	Free-roaming cat	Rural	Quebec	Canada	The objective of this study was to evaluate the impact of a trap-neuter-return (TNR) event on the size of free-roaming rural cat colonies in Quebec.	The study took place from May 2014 to August 2015. The first 20 colonies that met all inclusion criteria were included. An intensive trapping effort took place for 48 h in each colony from the TNR group immediately after the size of each colony had been evaluated by camera. The comparability of the TNR and control group at randomization	A significant growth difference was observed in the number of cats between the TNR group and the control group at T7 (P = 0.03). When including kittens as well as adults, a trend towards a lower growth of the TNR group compared to the control group was noted at T7 (P = 0.06).	More field studies should be conducted in different settings in order to gain a better understanding of the main factors influencing the impact of TNR events. Given the scarce resources available for cat population control, it is essential that efforts are deployed the most efficient way possible and this can only be achieved if we have a good understanding of the problem.	1 year	135	130	Yes	Caretakers
28	2020	The impact of targeted trap–neuter–return efforts in the San Francisco Bay area	D. D. Spehar and P. J. Wolf	Trap–neuter–return (TNR)	Free-roaming cats	Urban	San Francisco, California	United States	To examine the impact of a long-term TNR program on a population of community cats residing on a pedestrian trail adjacent to an oceanic bay located on the West Coast of the U.S.	A population of 175 community cats, as determined by an initial census, living on a 2-mile section of the San Francisco. Results from the initial census in 2004 were compared to results as of June 2020 for the entirety of the program area. Comparisons of results to similar TNR programs in other communities	A population of 175 community cats, as determined by an initial census, living on a 2-mile section of the San Francisco Bay Trail declined by 99.4% over a 16-year period. After the conclusion of the initial count, the presence of cats was monitored as part of the TNR program’s daily feeding regimen. Of the 258 total cats enrolled in the program between 2004 and 2020, only one remained at the end …	The results of the present study add to the mounting evidence indicating that TNR of sufficient duration and intensity is capable of greatly reducing a population of community cats and that, with adequate ongoing management, such results appear to be sustainable over long periods and in a variety of contexts.	16 years	258	1	Yes	Adoption, Trappers, Caretakers, Education
32	2006	Management of feral domestic cats in the urban environment of Rome (Italy)	E. Natoli, L. Maragliano, G. Cariola, A. Faini, R. Bonanni, S. Cafazzo, Fantini, C.	Trap-neuter-return (TNR)	Feral cat	Urban	Rome	Italy	To present data on registered colonies and censused cats in Rome from 1991 to 2000; the results of the neutering campaign from 1991 to 2000 in a TNR program.	Colonies were censused and registered by the VPS (Veterinary Public Services) after an evaluation on the site and on the state of the cats. A survey to describe the effects of the neutering campaign was started in November of 2000 and was completed in June 2001.	Number of cats per colony ranged from 3 to more than 80. In 10 years, almost 8000 (out of 13,273 cats declared and 5792 colonies registered) were captured by cat care-takers, neutered by the VPS and reintroduced in their original colony by cat care-takers. The survey carried out in 2000 on 103 cat colonies showed that the neutering campaigns brought about a general decrease in cat number (from 16…	All these efforts without an effective education of people to control the reproduction of house cats (as a prevention for abandonment) are a waste of money, time and energy. The main evidence is that TNR programs produce a conspicuous (16–32%) decrease on total cat number, but not as great as hoped and not before at least 3 years from neutering.	10 years	1665	1293	Yes	Caretakers, Trappers
